# Supplementary material for: Statin Therapy and the Risk of Viral Infection: A Retrospective Population-Based Cohort Study
Source: MDPI journal article supplement (doi:10.3390/jcm11195626), 2022-09-24
Supplement: s1 [file s1]

Supplemental Table S1. ICD-9-CM codes for diseases

| ICD-9-CM codes                                                                                            | Diagnosis               |
|-----------------------------------------------------------------------------------------------------------|-------------------------|
| 272                                                                                                       | Hyperlipidemia          |
| 401-405                                                                                                   | Hypertension Diabetes   |
| 250                                                                                                       | Rheumatoid disease      |
| 714                                                                                                       | Alcohol-related disease |
| 291, 303, 305, 571.0, 571.1, 571.2, 571.3,<br>790.3, V11.3                                                | Asthma                  |
| 493                                                                                                       | Transplantation         |
| V420, V421, V426, V427, V4281,<br>V4282, V4283, V4284, V4289, 99681,<br>99682, 99683, 99684, 99685, 99686 | Chronic liver disease   |
| 571                                                                                                       | CKD or ESRD             |
| 585, 586, 588.8-588.9                                                                                     | COPD                    |
| 491, 492, 496                                                                                             | HIV                     |
| 042-044, 7958, V08                                                                                        | Cancer                  |
| 140-208                                                                                                   | CHF                     |
| 428                                                                                                       | Stroke                  |
| 430-438                                                                                                   |                         |
| 071-079, 045-049, 055-056, 060-066, 460                                                                   | Viral infection         |
